# Supplementary material for: Evaluation of a Biocide Used in the Biological Isolation and Containment Unit of a Veterinary Teaching Hospital
Source: MDPI journal article supplement (doi:10.3390/antibiotics10060639), 2021-05-27
Supplement: s1 [file s1]

### Neutralizer Toxicity Control

**Table S1.** Results obtained, in number of colonies per plate, regarding the neutralizer toxicity controls (assay 1 and assay 2), made in order to guarantee the absence of toxicity by the neutralizer. Different concentrations of sodium thiosulfate (3, 5, 8, 10, 15, 20 g/L were tested).

| ATCC Tested                                 | Neutralizer Composition |                                | Number of Colonies      |         |          |         |
|---------------------------------------------|-------------------------|--------------------------------|-------------------------|---------|----------|---------|
|                                             |                         |                                | Incubation Time (37 °C) |         |          |         |
|                                             |                         |                                | 24 hours                |         | 48 hours |         |
|                                             |                         |                                | Assay 1                 | Assay 2 | Assay 1  | Assay 2 |
| <i>Escherichia coli</i><br>ATCC 10536       | Control                 |                                | 43                      |         | 43       |         |
|                                             |                         | 3                              | 44                      | 42      | 44       | 42      |
|                                             | Polysorbate 80          | 5                              | 32                      | 40      | 32       | 40      |
|                                             | (30 g/L)                | Sodium<br>Thiosulfate<br>(g/L) | 34                      | 33      | 34       | 34      |
|                                             | +                       |                                | 41                      | 36      | 41       | 36      |
|                                             | Lecithin                |                                | 34                      | 44      | 35       | 44      |
|                                             | (3 g/L)                 |                                | 43                      | 55      | 43       | 55      |
|                                             |                         | 20                             |                         |         |          |         |
| <i>Enterococcus hirae</i><br>ATCC 10541     | Control                 |                                | 39                      |         | 39       |         |
|                                             |                         | 3                              | 47                      | 36      | 47       | 36      |
|                                             | Polysorbate 80          | 4                              | 36                      | 38      | 36       | 38      |
|                                             | (30 g/L)                | Sodium<br>Thiosulfate<br>(g/L) | 39                      | 30      | 39       | 30      |
|                                             | +                       |                                | 45                      | 47      | 45       | 47      |
|                                             | Lecithin                |                                | 40                      | 28      | 41       | 29      |
|                                             | (3 g/L)                 |                                | 38                      | 39      | 39       | 39      |
|                                             |                         | 20                             |                         |         |          |         |
| <i>Pseudomonas aeruginosa</i><br>ATCC 15442 | Control                 |                                | 13                      |         | 13       |         |
|                                             |                         | 3                              | 10                      | 10      | 10       | 11      |
|                                             | Polysorbate 80          | 5                              | 11                      | 16      | 13       | 18      |
|                                             | (30 g/L)                | Sodium<br>Thiosulfate<br>(g/L) | 15                      | 16      | 15       | 16      |
|                                             | +                       |                                | 10                      | 13      | 10       | 15      |
|                                             | Lecithin                |                                | 16                      | 16      | 17       | 16      |
|                                             | (3 g/L)                 |                                | 11                      | 14      | 15       | 15      |
|                                             |                         | 20                             |                         |         |          |         |
| <i>Staphylococcus aureus</i><br>ATCC 6538   | Control                 |                                | 35                      |         | 36       |         |
|                                             |                         | 3                              | 45                      | 40      | 46       | 40      |
|                                             | Polysorbate 80          | 5                              | 32                      | 36      | 32       | 36      |
|                                             | (30 g/L)                | Sodium<br>Thiosulfate<br>(g/L) | 27                      | 33      | 27       | 33      |
|                                             | +                       |                                | 40                      | 33      | 40       | 34      |
|                                             | Lecithin                |                                | 43                      | 38      | 43       | 39      |
|                                             | (3 g/L)                 |                                | 28                      | 35      | 28       | 36      |
|                                             |                         | 20                             |                         |         |          |         |

## Neutralizing Method Validation

**Table S2.** Results obtained, in number of colonies per plate, regarding the neutralizing method validation controls (assay 1 and assay 2), made in order to guarantee Virkon S's neutralization. The number of colonies was determined after a 24- and 48-hour period of incubation at 37 °C. Different concentrations of sodium thiosulfate (3, 5, 8, 10, 15, 20 g/L were tested).

| Interfering Substance | Neutralizer Composition                    |                          |    | Number of Colonies      |         |          |         |
|-----------------------|--------------------------------------------|--------------------------|----|-------------------------|---------|----------|---------|
|                       |                                            |                          |    | Incubation Time (37 °C) |         |          |         |
|                       |                                            |                          |    | 24 hours                |         | 48 hours |         |
|                       |                                            |                          |    | Assay 1                 | Assay 2 | Assay 1  | Assay 2 |
| None                  | Polysorbate 80 (30 g/L) + Lecithin (3 g/L) | Sodium Thiosulfate (g/L) | 3  | 40                      | 42      | 42       | 43      |
|                       |                                            |                          | 5  | 40                      | 47      | 40       | 47      |
|                       |                                            |                          | 8  | 52                      | 49      | 52       | 49      |
|                       |                                            |                          | 10 | 50                      | 46      | 51       | 48      |
|                       |                                            |                          | 15 | 55                      | 51      | 55       | 51      |
|                       |                                            |                          | 20 | 49                      | 41      | 48       | 41      |
| Low                   | Polysorbate 80 (30 g/L) + Lecithin (3 g/L) | Sodium Thiosulfate (g/L) | 3  | 74                      | -       | 74       | -       |
|                       |                                            |                          | 5  | 80                      | 88      | 80       | 88      |
|                       |                                            |                          | 8  | 86                      | 70      | 86       | 73      |
|                       |                                            |                          | 10 | 92                      | 86      | 92       | 88      |
|                       |                                            |                          | 15 | 86                      | 94      | 88       | 94      |
|                       |                                            |                          | 20 | 114                     | 105     | 114      | 105     |
| High                  | Polysorbate 80 (30 g/L) + Lecithin (3 g/L) | Sodium Thiosulfate (g/L) | 3  | 172                     | 179     | 172      | 179     |
|                       |                                            |                          | 5  | 187                     | 189     | 191      | 189     |
|                       |                                            |                          | 8  | 196                     | 191     | 196      | 191     |
|                       |                                            |                          | 10 | 189                     | 202     | 189      | 202     |
|                       |                                            |                          | 15 | 215                     | 204     | 215      | 214     |
|                       |                                            |                          | 20 | 201                     | 209     | 201      | 209     |
